# Supplementary material for: Estrogen Promotes Mandibular Condylar Fibrocartilage Chondrogenesis and Inhibits Degeneration via Estrogen Receptor Alpha in Female Mice
Source: PubMed Central journal article supplement (PMC5986784; doi:10.1038/s41598-018-26937-w), 2018-06-04
Supplement: 41598_2018_26937_MOESM1_ESM.pdf [file 41598_2018_26937_MOESM1_ESM.pdf]

## Supplementary Information

# Estrogen Promotes Mandibular Condylar Fibrocartilage Chondrogenesis and Inhibits Degeneration via Estrogen Receptor Alpha in Female Mice

\***Jennifer L. Robinson, PhD<sup>a,c</sup>**, Paola Soria, DDS<sup>b</sup>, Manshan Xu, MD, PhD<sup>b</sup>, Mark Vrana<sup>a</sup>, Jeffrey Luchetti<sup>a</sup>, Helen H. Lu, PhD<sup>c</sup>, Jing Chen, DDS, PhD<sup>b</sup>, Sunil Wadhwa, DDS, PhD<sup>b</sup>

*Columbia University <sup>a</sup>College of Dental Medicine - <sup>b</sup>Division of Orthodontics,*

*622 West 168<sup>th</sup> Street*

*New York, NY 10032*

*Columbia University <sup>c</sup>Department of Biomedical Engineering*

*351 Engineering Terrace*

*1210 Amsterdam Avenue*

*New York, NY 10027*

*Manuscript Submitted to **Scientific Reports***

Corresponding author:

Dr. Jennifer Robinson

Department of Chemical and Petroleum Engineering

1520 West 15<sup>th</sup> Street, Learned 4132F

Lawrence, KS 66045

P: (785) 864-0298

[jlrobinson@ku.edu](mailto:jlrobinson@ku.edu)

[Jennyholmrobinson@gmail.com](mailto:Jennyholmrobinson@gmail.com)

## SUPPLEMENTARY MATERIALS AND METHODS

### *RNA-Sequencing, Library Generation, and Bioinformatics Analysis*

Endogenous DNase was removed utilizing the DNase treatment removal kit (Ambion, Life Technologies). Purity and integrity was confirmed using an Agilent 2100 Bioanalyzer (Agilent Technologies) and all values were above 9.0. Libraries were generated for sequencing using an Illumina TruSeq RNA prep kit and sequenced utilizing Illumina HiSeq2500/HiSeq4000 at the Columbia Genome Center. RTA (Illumina) was utilized for base calling and bcl2fastq2 (version 2.17) used for converting BCL to fastq format, coupled with adaptor trimming. The reads were mapped to a reference genome (Mouse: UCSC/mm9) using Tophat (version 2.1.0) with 4 mismatches and 10 maximum multiple hits. Differentially expressed genes were determined using DEseq, an R package based on a negative binomial distribution that model the number reads from RNA seq experiments and tests for differential expression. All raw and processed data for both 7- and 17-week data sets are uploaded to the NCBI GEO database.

### *Immunohistochemistry and BrdU Staining*

Collagen type II (Millipore; MAB8887 – mouse monoclonal (6B3), 1:100 dilution), Sclerostin (Sost) (Abcam; ab115568 – rabbit polyclonal, 1:100 dilution), Alpha-2-Macroglobulin (A2m) (Biorbyt, orb2676 - rabbit polyclonal, 1:100 dilution), Pi15 (Biorbyt, orb375374 – goat polyclonal, 1:100 dilution) and collagen type 1 and 2 cleavage (C1,2C) (IBEX Pharmaceuticals, #50-1035 – rabbit polyclonal, 1:100) were the primary antibodies utilized in this study. After incubation with the primary antibodies (Col2: 60 minutes at RT; Sost, A2m, and C1,2C: overnight at 4°C), sections were washed twice in PBS. The secondary antibody – horseradish peroxidase (HRP) conjugate (SuperPicture™, Life Technologies) was added and incubated for 30 minutes at RT. Following 2X PBS wash, sections were stained with DAB chromogen (30 µL DAB in 1 mL diluent, ImmPACT DAB, Vector Laboratories) for 2 minutes for Col2 and C1,2C sections and 10 minutes for Sost, A2m, and Pi15 samples. For Col2 and Sost staining, sections were then counterstained with either hematoxylin (Col2 staining) or 0.2% Fast Green (Sost staining) for 30 seconds, dehydrated, and mounted.

BrdU immunohistochemical analysis to determine proliferating cells was completed using a BrdU staining kit following the manufacturer's instructions (Zymed Laboratories-Invitrogen

Corporation, Carlsbad, CA, USA). To quantify BrdU, the labeling index (number of BrdU positive cells divided by the total number of cells) was calculated. Three to six sections, corresponding to the same anatomical region utilized to determine total cell number (mid-coronal), were counted for each group and the average index of these sections was used for the labeling index.

**Supplementary Table 1:** List of genes with corresponding Log2 fold change > absolute value of 2 and p-value < 0.01 from 7-week WT RNA sequencing analysis

| Gene    | Gene Description                               | Fold Change (Log2) | P Value   |
|---------|------------------------------------------------|--------------------|-----------|
|         | Transient Receptor Potential Cation Channel    |                    |           |
| Trpc6   | Subfamily Member 6                             | 3.91               | 7.87E-103 |
| Pi15    | Peptidase Inhibitor 15                         | 3.56               | 1.38E-46  |
| Cxcl12  | C-X-C Motif Chemokine Ligand 12                | -2.11              | 2.44E-40  |
| Spib    | Spi-B Transcription Factor                     | -4.38              | 1.43E-36  |
| Myb     | MYB Proto-Oncogene, Transcription Factor       | -4.46              | 5.06E-34  |
| Lgi2    | Leucine Rich Repeat LGI Family Member 2        | 4.77               | 1.02E-32  |
| A2m     | Alpha-2-Macroglobulin                          | 2.62               | 6.03E-32  |
|         | Growth Regulation by Estrogen in Breast Cancer |                    |           |
| Greb1   | 1                                              | 5.20               | 1.22E-28  |
| Prtn3   | Proteinase 3                                   | -4.94              | 7.62E-27  |
| Limch1  | LIM and Calphonin Homology Domains 1           | -2.33              | 2.00E-26  |
| Sftpa1  | Surfactant Protein A1                          | 5.69               | 2.70E-26  |
| Asb4    | Ankyrin Repeat and SOCS Box Containing 4       | 4.81               | 3.15E-25  |
| CtsG    | Cathepsin G                                    | -5.48              | 1.26E-22  |
| Plac8   | Placenta Specific 8                            | -3.82              | 5.62E-20  |
| Shank2  | SH3 and Multiple Ankyrin Repeat Domains 2      | 3.75               | 8.71E-19  |
| Cecr2   | Histone Acetyl-Lysine Reader                   | -4.65              | 1.33E-18  |
| Alox15  | Arachidonate 15-Lipoxygenase                   | -5.14              | 4.88E-18  |
| Myo5c   | Myosin VC                                      | 3.62               | 1.04E-16  |
| Rag1    | Recombination Activating 1                     | -4.63              | 1.97E-16  |
| Cd79a   | CD79a Molecule                                 | -3.52              | 6.85E-16  |
| Ms4a3   | Membrane Spanning 4-Domains A3                 | -4.89              | 1.46E-15  |
| Vpreb3  | V-Set Pre-B Cell Surrogate Light Chain 3       | -4.11              | 1.46E-15  |
|         | ST8 Alpha-N-Acetyl-Neuraminidase Alpha-2,8-    |                    |           |
| St8sia2 | Sialyltransferase 2                            | -4.16              | 1.69E-14  |
| Gbp4    | Guanylate Binding Protein 4                    | 2.08               | 5.32E-14  |
| Pou2af1 | POU Class 2 Associating Factor 1               | -3.59              | 5.64E-14  |
| Nup210  | Nucleoporin 210                                | -2.90              | 6.94E-14  |
| Fcrla   | Fc Receptor Like A                             | -3.75              | 1.62E-13  |
| Csf3r   | Colony Stimulating Factor 3 Receptor           | -2.54              | 5.18E-13  |
| Prss34  | Protease, Serine 34                            | -4.73              | 7.46E-13  |
| Gbp8    | Guanylate Binding Protein 8                    | 3.05               | 9.21E-13  |
|         | Adiponectin, C1Q and Collagen Domain           |                    |           |
| Adipoq  | Containing                                     | -3.42              | 1.82E-12  |
| Dntt    | DNA Nucleotidylexotransferase                  | -4.40              | 1.99E-12  |
| Chl1    | Cell Adhesion Molecule L1 Like                 | -3.76              | 2.72E-12  |
| Mrv1    | Murine Retrovirus Integration Site 1 Homolog   | 2.11               | 3.88E-12  |

|               |                                                                         |       |          |
|---------------|-------------------------------------------------------------------------|-------|----------|
| 4833424O15Rik | PLPPR5, Phospholipid Phosphatase Related 5                              | 2.14  | 7.78E-12 |
| Gbp6          | Guanylate Binding Protein 6                                             | 2.71  | 9.33E-12 |
| Mgl2          | Macrophage Galactose N-Acetyl-Galactosamine Specific Lectin 2           | 2.35  | 2.80E-11 |
| Ppbp          | Pro-Platelet Basic Protein                                              | -3.49 | 3.50E-11 |
| Cd19          | CD19 Molecule                                                           | -2.38 | 3.67E-10 |
| Sfn1          | Schlafen 1                                                              | -3.62 | 1.06E-09 |
| Ptpcrap       | Protein Tyrosine Phosphatase, Receptor Type C Associated Protein        | -3.08 | 1.34E-09 |
| Luzp2         | Leucine Zipper Protein 2                                                | -2.28 | 2.03E-09 |
| Fam129c       | Family with Sequence Similarity 129 Member C                            | -2.23 | 3.37E-09 |
| Sell          | Selectin L                                                              | -2.85 | 3.89E-09 |
| Siglecg       | Sialic Acid Binding Ig-like Lectin G                                    | -2.89 | 8.54E-09 |
| Cd79b         | CD79b Molecule                                                          | -2.70 | 8.73E-09 |
| Fcnb          | Ficolin 1                                                               | -3.93 | 1.65E-08 |
| Cxcr2         | C-X-C Motif Chemokine Receptor 2                                        | -2.92 | 8.54E-08 |
| Igll1         | Immunoglobulin Lambda Like Polypeptide 1                                | -3.26 | 1.41E-07 |
| 1810033B17Rik | MCEMP1, Mast Cell Expressed Membrane Protein 1                          | -3.33 | 1.83E-07 |
| Ly6d          | Lymphocyte Antigen 6 Family Member D                                    | -2.87 | 2.29E-07 |
| Mzb1          | Marginal Zone B and B1 Cell Specific Protein                            | -3.49 | 6.96E-07 |
| Coch          | Cochlin                                                                 | 2.79  | 1.22E-06 |
| Mcpt8         | Mast Cell Protease 8                                                    | -3.63 | 1.24E-06 |
| Ccr2          | C-C Motif Chemokine Receptor 2                                          | -2.10 | 1.95E-06 |
| Dpp4          | Dipeptidyl Peptidase 4                                                  | -2.40 | 3.06E-06 |
| Fcho1         | FCH Domain Only 1                                                       | -2.94 | 1.04E-05 |
| Ear6          | Eosinophil-Associated, Ribonuclease A Family, Member 6                  | -3.39 | 1.05E-05 |
| Il1f9         | Interleukin 36, Gamma                                                   | -3.38 | 1.35E-05 |
| Fam196b       | Family with Sequence Similarity 196 Member B                            | 3.25  | 1.69E-05 |
| Trem12        | Triggering Receptor Expressed on Myeloid Cells Like 2                   | -2.48 | 2.01E-05 |
| Camp          | Cathelicidin Antimicrobial Peptide                                      | -2.78 | 2.18E-05 |
| Gpr88         | G Protein-Coupled Receptor 88                                           | -2.01 | 2.65E-05 |
| Pglyrp1       | Peptidoglycan Recognition Protein 1                                     | -2.62 | 2.67E-05 |
| Ly6c2         | Lymphocyte Antigen 6 Complex, Locus C2                                  | -3.15 | 3.12E-05 |
| Prss57        | Protease, Serine 57                                                     | -3.24 | 3.12E-05 |
| Padi4         | Peptidyl Arginine Deiminase 4                                           | -2.85 | 8.85E-05 |
| Cd177         | CD177 Molecule                                                          | -2.58 | 1.92E-04 |
| Gapt          | GRB2 Binding Adaptor Protein, Transmembrane                             | -2.72 | 1.99E-04 |
| Cebpe         | CCAAT/Enhancer Binding Protein Epsilon                                  | -2.98 | 2.57E-04 |
| Bcl11a        | B-Cell CLL/Lymphoma 11A                                                 | -2.45 | 2.92E-04 |
| Napsa         | Napsin A Aspartic Peptidase                                             | -2.37 | 4.34E-04 |
| Il7r          | Interleukin 7 Receptor                                                  | -2.39 | 6.41E-04 |
| Hcn4          | Hyperpolarization Activated Cyclic Nucleotide Gated Potassium Channel 4 | 2.60  | 6.54E-04 |
| Trem3         | Triggering Receptor Expressed on Myeloid Cells 3                        | -2.78 | 7.29E-04 |

|          |                                                                             |       |          |
|----------|-----------------------------------------------------------------------------|-------|----------|
| Pik3c2g  | Phosphatidylinositol-4-Phosphate 3-Kinase<br>Catalytic Subunit Type 2 Gamma | -2.42 | 8.53E-04 |
| Tbc1d10c | TBC1 Domain Family Member 10C                                               | -2.07 | 1.11E-03 |
| Ripk4    | Receptor Interacting Serine/Threonine Kinase 4                              | 2.68  | 1.17E-03 |
| Ppef1    | Protein Phosphatase with EF-Hand Domain 1                                   | 2.07  | 1.49E-03 |
| Ctse     | Cathepsin E                                                                 | -2.69 | 1.52E-03 |
| Nfe2     | Nuclear Factor, Erythroid 2                                                 | -2.26 | 1.71E-03 |
| Klk4     | Kallikrein Related Peptidase 4                                              | -2.69 | 1.76E-03 |
| Prg3     | Proteoglycan 3, Pro-Eosinophil Major Basic<br>Protein 2                     | -2.62 | 2.67E-03 |
| Rag2     | Recombination Activating 2                                                  | -2.60 | 3.08E-03 |
| Celf6    | CUGBP Elav-Like Family Member 6                                             | 2.51  | 3.63E-03 |
| Il2ra    | Interleukin 2 Receptor Subunit Alpha                                        | -2.49 | 3.70E-03 |
| Nkg7     | Natural Killer Cell Granule Protein 7                                       | -2.41 | 4.39E-03 |
| Mapt     | Microtubule Associated Protein Tau                                          | -2.14 | 4.85E-03 |
| Bfsp2    | Beaded Filament Structural Protein 2                                        | -2.51 | 5.71E-03 |
| Vpreb1   | V-Set Pre-B Cell Surrogate Light Chain<br>1                                 | -2.27 | 5.71E-03 |
| Prg2     | Proteoglycan 2, Pro Eosinophil Major Basic<br>Protein                       | -2.50 | 5.98E-03 |
| Cyp11a1  | Cytochrome P450 Family 11 Subfamily A<br>Member 1                           | 2.14  | 6.09E-03 |
| Blk      | BLK Proto-Oncogene, Src Family<br>Tyrosine Kinase                           | -2.05 | 7.16E-03 |
| S100a8   | S100 Calcium Binding Protein A8                                             | -2.41 | 7.22E-03 |
| Dbp      | D-Box Binding PAR BZIP Transcription Factor                                 | -2.46 | 7.26E-03 |
| Retnlg   | Resistin Like Gamma                                                         | -2.39 | 8.69E-03 |
| Tmprss3  | Transmembrane Protease, Serine 3                                            | -2.40 | 9.47E-03 |

**Supplementary Table 2:** List of genes with corresponding Log2 fold change > absolute value of 2 and p-value < 0.01 from 7-week ERαKO RNA sequencing analysis

| Gene   | Gene Description                                                   | Fold Change<br>(Log2) | P Value  |
|--------|--------------------------------------------------------------------|-----------------------|----------|
| Eef1a2 | Eukaryotic Translation Elongation<br>Factor 1 Alpha 2              | -3.96                 | 2.21E-13 |
| Obscn  | Obscurin, Cytoskeletal Calmodulin and Titin-<br>Interacting RhoGEF | -3.38                 | 9.99E-13 |
| Mb     | Myoglobin                                                          | -3.76                 | 1.94E-09 |
| Myh2   | Myosin Heavy Chain 2                                               | -3.79                 | 3.26E-09 |
| Klhl41 | Kelch Like Family Member 41                                        | -3.26                 | 4.66E-09 |
| Acta1  | Actin, Alpha 1, Skeletal Muscle                                    | -3.63                 | 1.21E-08 |
| Nkg7   | Natural Killer Cell Granule Protein 7                              | 2.91                  | 1.70E-08 |
| Csrp3  | Cysteine and Glycine Rich Protein 3                                | -3.41                 | 1.96E-08 |
| Mcpt8  | Mast Cell Protease 8                                               | 3.39                  | 2.65E-08 |
| Trdn   | Triadin                                                            | -3.30                 | 3.13E-08 |
| Mybpc1 | Myosin Binding Protein C, Slow Type                                | -3.51                 | 4.37E-08 |

|               |                                                                     |       |          |
|---------------|---------------------------------------------------------------------|-------|----------|
| Myoz2         | Myozenin 2                                                          | -3.38 | 4.63E-08 |
| Lingo1        | Leucine Rich Repeat and Ig Domain<br>Containing 1                   | -2.40 | 7.02E-08 |
| Tnnt3         | Troponin T3, Fast Skeletal Type                                     | -3.33 | 8.48E-08 |
| Casq1         | Calsequestrin 1                                                     | -2.89 | 1.10E-07 |
| Ckm           | Creatine Kinase, M-Type                                             | -3.37 | 1.63E-07 |
| Hfe2          | Hemochromatosis Type 2 (Juvenile)                                   | -3.28 | 1.66E-07 |
| Ldb3          | LIM Domain Binding 3                                                | -2.60 | 1.71E-07 |
| Odam          | Odontogenic, Ameloblast Associated                                  | 3.21  | 2.00E-07 |
| Tnnc2         | Troponin C2, Fast Skeletal Type                                     | -3.37 | 2.01E-07 |
| Cacna1s       | Calcium Voltage-Gated Channel Subunit<br>Alpha1 S                   | -2.98 | 2.04E-07 |
| Cox8b         | Cytochrome C Oxidase Subunit 8B, Pseudogene                         | -3.30 | 4.32E-07 |
| Ckmt2         | Creatine Kinase, Mitochondrial 2                                    | -3.26 | 7.82E-07 |
| Neb           | Nebulin                                                             | -3.21 | 1.03E-06 |
| Tcap          | Titin-Cap                                                           | -3.19 | 1.21E-06 |
| Lmod2         | Leiomodin 2                                                         | -3.04 | 1.43E-06 |
| Xirp2         | Xin Actin Binding Repeat Containing 2                               | -3.22 | 1.52E-06 |
| Actn2         | Actinin Alpha 2                                                     | -3.19 | 1.90E-06 |
| Gca           | Grancalcin                                                          | 2.38  | 1.99E-06 |
| Gm129         | Gene Model 129                                                      | -2.31 | 2.91E-06 |
| B430306N03Rik | RIKEN cDNA B430306N03 gene                                          | 2.35  | 3.63E-06 |
| Clec4e        | C-Type Lectin Domain Family 4 Member E                              | 2.77  | 3.72E-06 |
| Alpk3         | Alpha Kinase 3                                                      | -2.69 | 5.28E-06 |
| Cox6a2        | Cytochrome C Oxidase Subunit 6A2                                    | -2.56 | 8.27E-06 |
| Smpx          | Small Muscle Protein, X-Linked                                      | -3.01 | 8.27E-06 |
| Mylk2         | Myosin Light Chain Kinase 2                                         | -2.68 | 8.62E-06 |
| Jsrp1         | Junctional Sarcoplasmic Reticulum Protein 1                         | -2.78 | 1.06E-05 |
| Ms4a4c        | Membrane Spanning 4-Domains A4A                                     | 2.35  | 1.06E-05 |
| Smtnl1        | Smoothelin Like 1                                                   | -2.93 | 1.24E-05 |
| Pdlim3        | PDZ And LIM Domain 3                                                | -2.32 | 1.46E-05 |
| Atp1a2        | ATPase Na <sup>+</sup> /K <sup>+</sup> Transporting Subunit Alpha 2 | -2.83 | 1.48E-05 |
| Synpo2l       | Synaptopodin 2 Like                                                 | -2.65 | 2.08E-05 |
| Sirpb1b       | Signal-Regulatory Protein Beta 1B                                   | 2.75  | 3.35E-05 |
| Lilra6        | Leukocyte Immunoglobulin Like Receptor A6                           | 2.25  | 3.83E-05 |
| Trem1         | Triggering Receptor Expressed on Myeloid Cells<br>1                 | 2.56  | 3.85E-05 |
| Sh3bgr        | SH3 Domain Binding Glutamate Rich<br>Protein                        | -2.44 | 6.19E-05 |
| Trim54        | Tripartite Motif Containing 54                                      | -2.73 | 6.56E-05 |
| Mogat2        | Monoacylglycerol O-Acyltransferase 2                                | 2.51  | 9.46E-05 |
| Ryr1          | Ryanodine Receptor 1                                                | -2.55 | 1.46E-04 |
| Map3k9        | Mitogen-Activated Protein Kinase Kinase<br>Kinase 9                 | 2.17  | 1.47E-04 |
| Des           | Desmin                                                              | -2.58 | 1.54E-04 |
| Hlf           | HLF, PAR BZIP Transcription Factor                                  | -2.38 | 1.62E-04 |
| Mylpf         | Myosin Light Chain, Phosphorylatable, Fast<br>Skeletal Muscle       | -2.56 | 1.70E-04 |
| Stfa2l1       | Stefin A2 Like 1                                                    | 2.57  | 1.80E-04 |

|               |                                                            |       |          |
|---------------|------------------------------------------------------------|-------|----------|
| Myoz3         | Myozenin 3                                                 | -2.62 | 1.80E-04 |
| Ttn           | Titin                                                      | -2.34 | 2.21E-04 |
| Pgam2         | Phosphoglycerate Mutase 2                                  | -2.61 | 2.27E-04 |
| Cldn15        | Claudin 15                                                 | 2.24  | 2.65E-04 |
| Kcna7         | Potassium Voltage-Gated Channel Subfamily a Member 7       | -2.39 | 4.32E-04 |
| Ltb4r1        | Leukotriene B4 Receptor 1                                  | 2.02  | 4.70E-04 |
| Myo18b        | Myosin XVIII B                                             | -2.16 | 4.94E-04 |
| Dbp           | D-Box Binding PAR BZIP Transcription Factor                | -2.32 | 5.03E-04 |
| Rasd2         | RASD Family Member 2                                       | -2.16 | 5.41E-04 |
| AU023871      | Megakaryocyte and Platelet Inhibitory Receptor G6b         | 2.48  | 5.75E-04 |
| Apobec2       | Apolipoprotein B mRNA Editing Enzyme Catalytic Subunit 2   | -2.18 | 6.30E-04 |
| Fcgr4         | Fc Receptor, IgG, Low Affinity IV                          | 2.04  | 7.17E-04 |
| Myl1          | Myosin Light Chain 1                                       | -2.26 | 7.76E-04 |
| Ankrd22       | Ankyrin Repeat Domain 22                                   | 2.28  | 7.97E-04 |
| Smyd1         | SET and MYND Domain Containing 1                           | -2.34 | 8.27E-04 |
| Sypl2         | Synaptophysin Like 2                                       | -2.10 | 8.27E-04 |
| Ankrd1        | Ankyrin Repeat Domain 1                                    | -2.41 | 8.98E-04 |
| Nlrp12        | NLR Family Pyrin Domain Containing 12                      | 2.19  | 1.19E-03 |
| Ceacam10      | Carcinoembryonic Antigen-Related Cell Adhesion Molecule 10 | 2.26  | 1.26E-03 |
| Galnt9        | Polypeptide N-Acetylgalactosaminyltransferase 9            | 2.00  | 1.41E-03 |
| A530064D06Rik | RIKEN cDNA A530064D06 Gene                                 | 2.03  | 1.48E-03 |
| Mgam          | Maltase-Glucoamylase                                       | 2.25  | 1.57E-03 |
| Nrap          | Nebulin Related Anchoring Protein                          | -2.30 | 1.67E-03 |
| Ppp1r3a       | Protein Phosphatase 1 Regulatory Subunit 3A                | -2.30 | 1.74E-03 |
| Tigd4         | Tigger Transposable Element Derived 4                      | -2.27 | 1.84E-03 |
| Mpl           | MPL Proto-Oncogene, Thrombopoietin Receptor                | 2.28  | 1.98E-03 |
| Ano5          | Anoctamin 5                                                | -2.23 | 2.73E-03 |
| Myom2         | Myomesin 2                                                 | -2.19 | 2.95E-03 |
| Tnfsf14       | TNF Superfamily Member 14                                  | 2.12  | 3.43E-03 |
| Xirp1         | Xin Actin Binding Repeat Containing 1                      | -2.13 | 3.56E-03 |
| Slc10a4       | Solute Carrier Family 10 Member 4                          | -2.02 | 4.09E-03 |
| Slco4c1       | Solute Carrier Organic Anion Transporter Family Member 4C1 | 2.04  | 4.45E-03 |
| Aqp9          | Aquaporin 9                                                | 2.08  | 4.57E-03 |
| Pvalb         | Parvalbumin                                                | -2.06 | 6.99E-03 |
| Myoz1         | Myozenin 1                                                 | -2.03 | 7.55E-03 |
| Gp9           | Glycoprotein IX Platelet                                   | 2.02  | 7.72E-03 |
| 2310002L09Rik | RIKEN cDNA 2310002L09 Gene                                 | -2.03 | 8.03E-03 |

**Supplementary Table 3:** List of genes with corresponding Log2 fold change > absolute value of 2 and p-value < 0.01 from 17-week WT RNA sequencing analysis

| Gene    | Gene Description                                                        | Fold Change (Log2) | P Value  |
|---------|-------------------------------------------------------------------------|--------------------|----------|
| Pi15    | Peptidase Inhibitor 15                                                  | 4.34               | 1.07E-75 |
| A2m     | Alpha-2-Macroglobulin                                                   | 2.77               | 4.69E-70 |
| Greb1   | Growth Regulation by Estrogen in Breast Cancer 1                        | 5.57               | 7.06E-51 |
| Lgi2    | Leucine Rich Repeat LGI Family Member 2                                 | 5.42               | 9.32E-36 |
| Trpc6   | Transient Receptor Potential Cation Channel Subfamily Member 6          | 3.69               | 3.81E-33 |
| Shank2  | SH3 and Multiple Ankyrin Repeat Domains 2                               | 3.39               | 8.02E-26 |
| Gbp8    | Guanylate Binding Protein 8                                             | 4.06               | 7.38E-25 |
| Myo5c   | Myosin VC                                                               | 3.31               | 6.18E-20 |
| Gbp4    | Guanylate Binding Protein 4                                             | 2.84               | 9.54E-20 |
| Mrvi1   | Murine Retrovirus Integration Site 1 Homolog                            | 2.41               | 1.38E-17 |
| Gbp6    | Guanylate Binding Protein 6                                             | 2.54               | 1.24E-15 |
| Sftpa1  | Surfactant Protein A1                                                   | 4.06               | 5.18E-15 |
| Mgl2    | Macrophage Galactose N-Acetyl-Galactosamine Specific Lectin 2           | 3.18               | 1.05E-14 |
| Micall2 | MICAL Like 2                                                            | 2.32               | 1.42E-11 |
| Asb4    | Ankyrin Repeat and SOCS Box Containing 4                                | 3.35               | 1.68E-11 |
| Hcn4    | Hyperpolarization Activated Cyclic Nucleotide Gated Potassium Channel 4 | 3.57               | 2.49E-11 |
| Ripk4   | Receptor Interacting Serine/Threonine Kinase 4                          | 3.27               | 3.24E-10 |
| Fam196b | Family with Sequence Similarity 196 Member B                            | 2.60               | 3.11E-06 |
| Ear6    | Eosinophil-Associated, Ribonuclease A Family, Member 6                  | -2.80              | 1.21E-05 |
| Tnnc1   | Troponin C1, Slow Skeletal And Cardiac Type                             | 2.31               | 6.72E-05 |
| Ntng1   | Netrin G1                                                               | 2.01               | 2.37E-04 |
| Gdf3    | Growth Differentiation Factor 3                                         | 2.19               | 6.71E-04 |
| Zfp804a | Zinc Finger Protein 804A                                                | 2.11               | 4.35E-03 |
| Ear2    | Eosinophil-Associated, Ribonuclease A Family, Member 2                  | -2.04              | 4.72E-03 |
| Gbp10   | Guanylate Binding Protein 10                                            | 2.05               | 6.58E-03 |
| Ctse    | Cathepsin E                                                             | -2.02              | 7.89E-03 |

**Supplementary Table 4:** List of genes with corresponding Log2 fold change > absolute value of 2 and p-value < 0.01 from 17-week ER $\alpha$ KO RNA sequencing analysis

| Gene  | Gene Description                             | Fold Change (Log2) | P Value  |
|-------|----------------------------------------------|--------------------|----------|
| Rbm24 | RNA Binding Motif Protein 24                 | -3.65              | 1.17E-10 |
| Scn4a | Sodium Voltage-Gated Channel Alpha Subunit 4 | -2.55              | 3.22E-04 |



**Supplemental Table 5:** List of genes significantly regulated in both 7-week and 17-week WT mandibular condylar fibrocartilage at Log2 fold change > absolute value of 2 and p-value < 0.01 from RNA sequencing analysis

| Gene    | 7-week Fold Change (Log2) | 7-week P Value | 17-week Fold Change (Log2) | 17-week P Value |
|---------|---------------------------|----------------|----------------------------|-----------------|
| Trpc6   | 3.91                      | 7.87E-103      | 3.69                       | 3.81E-33        |
| Pi15    | 3.56                      | 1.38E-46       | 4.34                       | 1.07E-75        |
| Lgi2    | 4.77                      | 1.02E-32       | 5.42                       | 9.32E-36        |
| A2m     | 2.62                      | 6.03E-32       | 2.77                       | 4.69E-70        |
| Greb1   | 5.20                      | 1.22E-28       | 5.57                       | 7.06E-51        |
| Sftpa1  | 5.69                      | 2.70E-26       | 4.06                       | 5.18E-15        |
| Asb4    | 4.81                      | 3.15E-25       | 3.35                       | 1.68E-11        |
| Shank2  | 3.75                      | 8.71E-19       | 3.39                       | 8.02E-26        |
| Myo5c   | 3.62                      | 1.04E-16       | 3.31                       | 6.18E-20        |
| Gbp4    | 2.08                      | 5.32E-14       | 2.84                       | 9.54E-20        |
| Gbp8    | 3.05                      | 9.21E-13       | 4.06                       | 7.38E-25        |
| Mrv1    | 2.11                      | 3.88E-12       | 2.41                       | 1.38E-17        |
| Gbp6    | 2.71                      | 9.33E-12       | 2.54                       | 1.24E-15        |
| Mgl2    | 2.35                      | 2.80E-11       | 3.18                       | 1.05E-14        |
| Ear6    | -3.39                     | 1.05E-05       | -2.80                      | 1.21E-05        |
| Fam196b | 3.25                      | 1.69E-05       | 2.60                       | 3.11E-06        |
| Hcn4    | 2.60                      | 6.54E-04       | 3.57                       | 2.49E-11        |
| Ripk4   | 2.68                      | 1.17E-03       | 3.27                       | 3.24E-10        |
| Ctse    | -2.69                     | 1.52E-03       | -2.02                      | 7.89E-03        |

**Supplementary Table 6:** Effect of estradiol treatment on ER $\alpha$  (ESR1) gene expression in RNA sequencing analysis of the mandibular condylar fibrocartilage from both 7-week and 17-week old WT female mice

| Gene           | Gene Description    | Fold Change (Log2) | P Value |
|----------------|---------------------|--------------------|---------|
| Esr1 (7-week)  | Estrogen receptor 1 | -0.49              | 0.67    |
| Esr1 (17-week) | Estrogen receptor 1 | -0.58              | 0.24    |

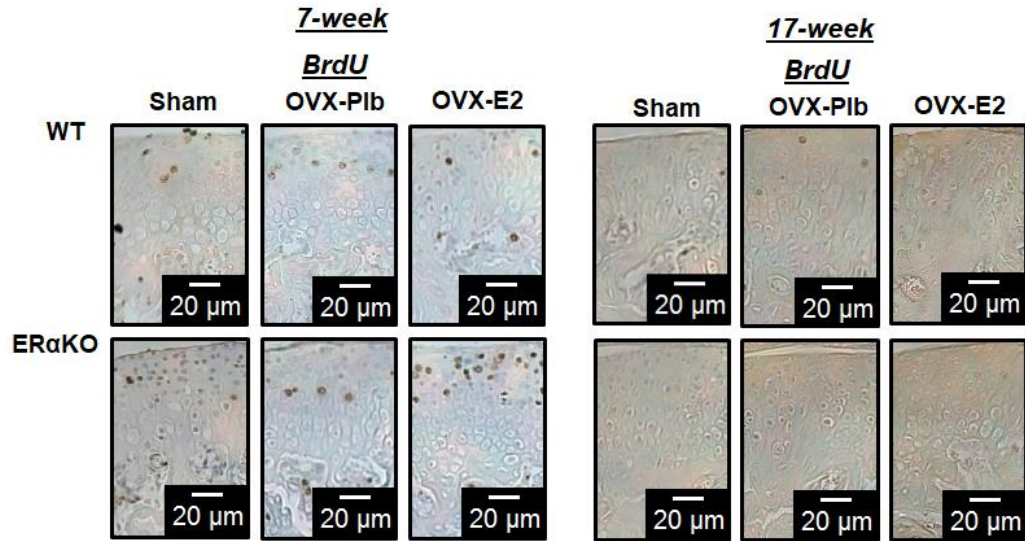

Supplementary Figure 1: Higher magnification images of BrdU staining in both 7- and 17-week samples for all groups

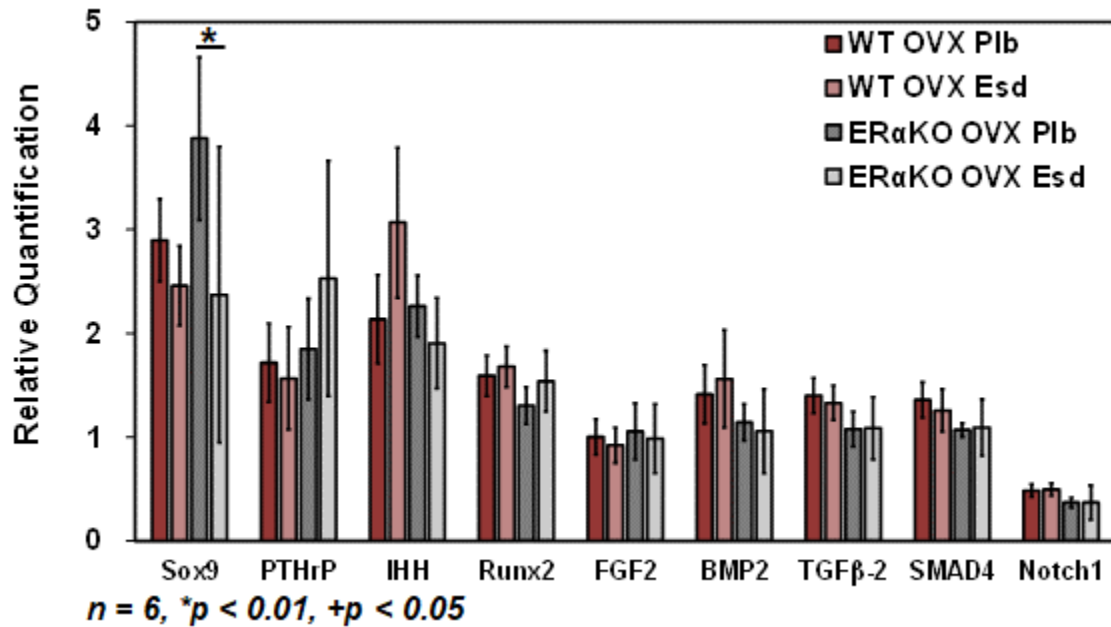

Supplementary Figure 2: Mandibular condylar fibrocartilage-related genes in 7-week old female mice. Gene expression of Sox9, Pthrp, Ihh, Runx2, FGF2, BMP2, TGFβ-2, SMAD4, and Notch1 from 7-week old mice. All values represent means  $\pm$  standard deviation.  $n = 6$  for all data,  $^+p < 0.01$ ,  $^*p < 0.05$ .

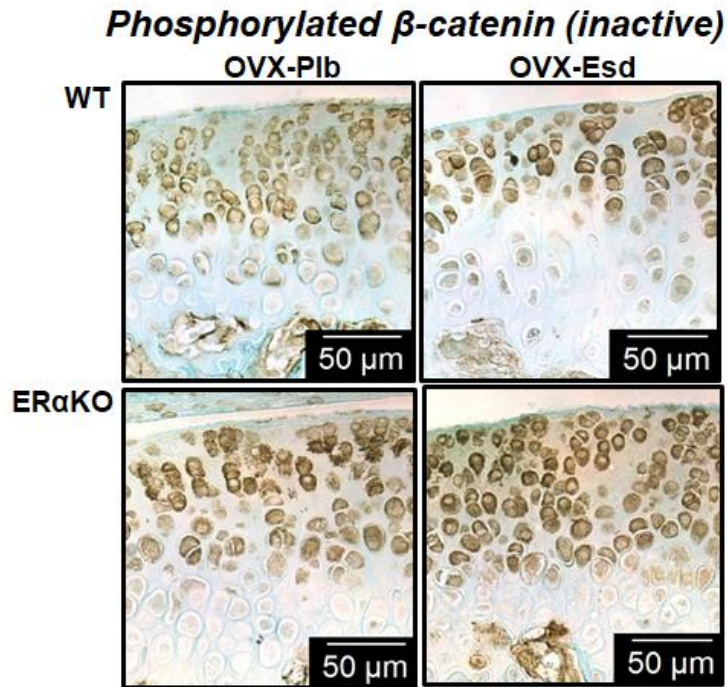

**Supplementary Figure 3: Immunohistochemical staining of inactive  $\beta$ -catenin in 7-week old WT and ER $\alpha$ KO samples** Representative phosphorylated  $\beta$ -catenin immunohistochemical images in WT and ER $\alpha$ KO female mice with placebo and estradiol treatment.

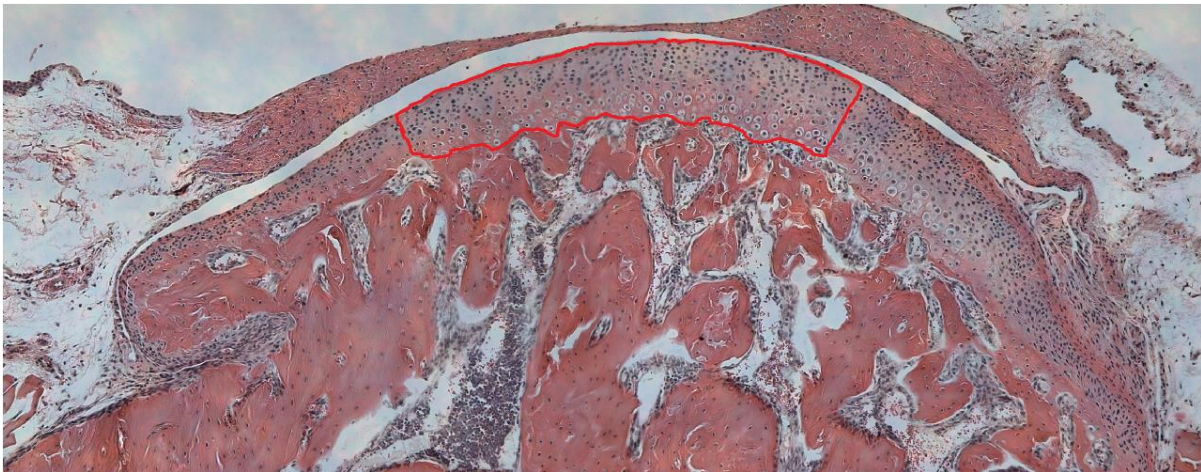

**Supplementary Figure 4: Delineation of region utilized to quantify fibrocartilage thickness in mandibular condylar H&E sections**

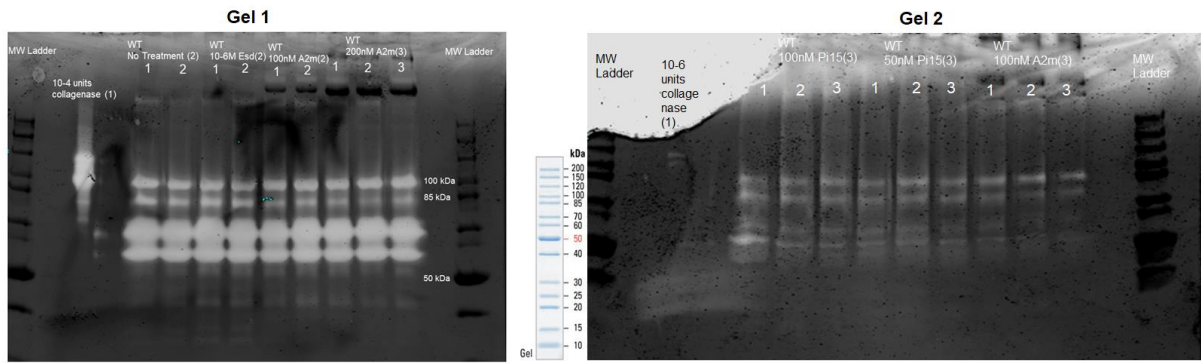

**Supplementary Figure 5.** Full length zymography gels using 10% gelatin substrates with supernatant analyzed after organ culture with A2m and Pi15 treatment using collagenase as a positive control.
